# Supplementary material for: Elevated VEGF levels contribute to the pathogenesis of osteoarthritis
Source: PubMed Central journal article supplement (PMC4391471; doi:10.1186/1471-2474-15-437), 2014-12-17

### VEGF expression levels (Osteoarthritis patients vs. Healthy controls)

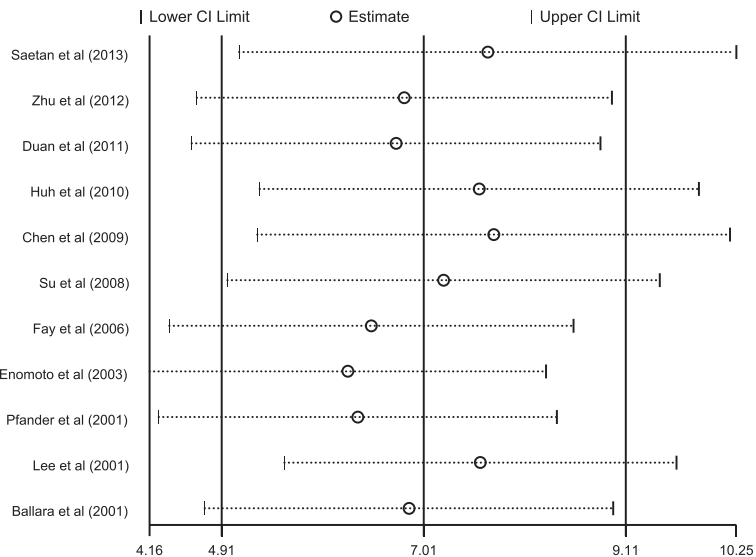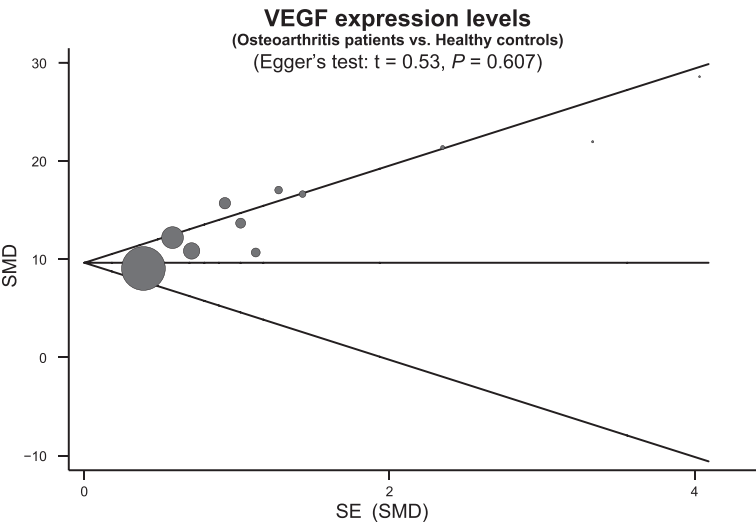

Supplement: 12891_2014_2444_MOESM5_ESM.pdf [file 12891_2014_2444_MOESM5_ESM.pdf]
