# Supplementary material for: Elevated VEGF levels contribute to the pathogenesis of osteoarthritis
Source: BMC Musculoskelet Disord. 2014 Dec 17;15:437. doi: 10.1186/1471-2474-15-437 (PMC4391471; doi:10.1186/1471-2474-15-437)

# VEGF expression levels

Included studies

(Osteoarthritis patients vs. Healthy controls)

SMD (95% CI)

Weight%

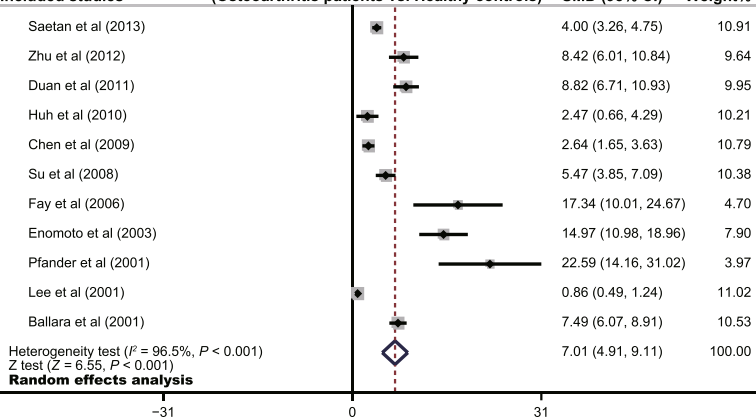

Supplement: Supplementary file 3 — Authors’ original file for figure 2 [file 12891_2014_2444_MOESM3_ESM.pdf]
